# Supplementary material for: Bacterial Seed Endophytes of Domesticated Cucurbits Antagonize Fungal and Oomycete Pathogens Including Powdery Mildew
Source: PubMed Central journal article supplement (PMC5807410; doi:10.3389/fmicb.2018.00042), 2018-02-05
Supplement: Image_1.pdf [file Image_1.pdf]

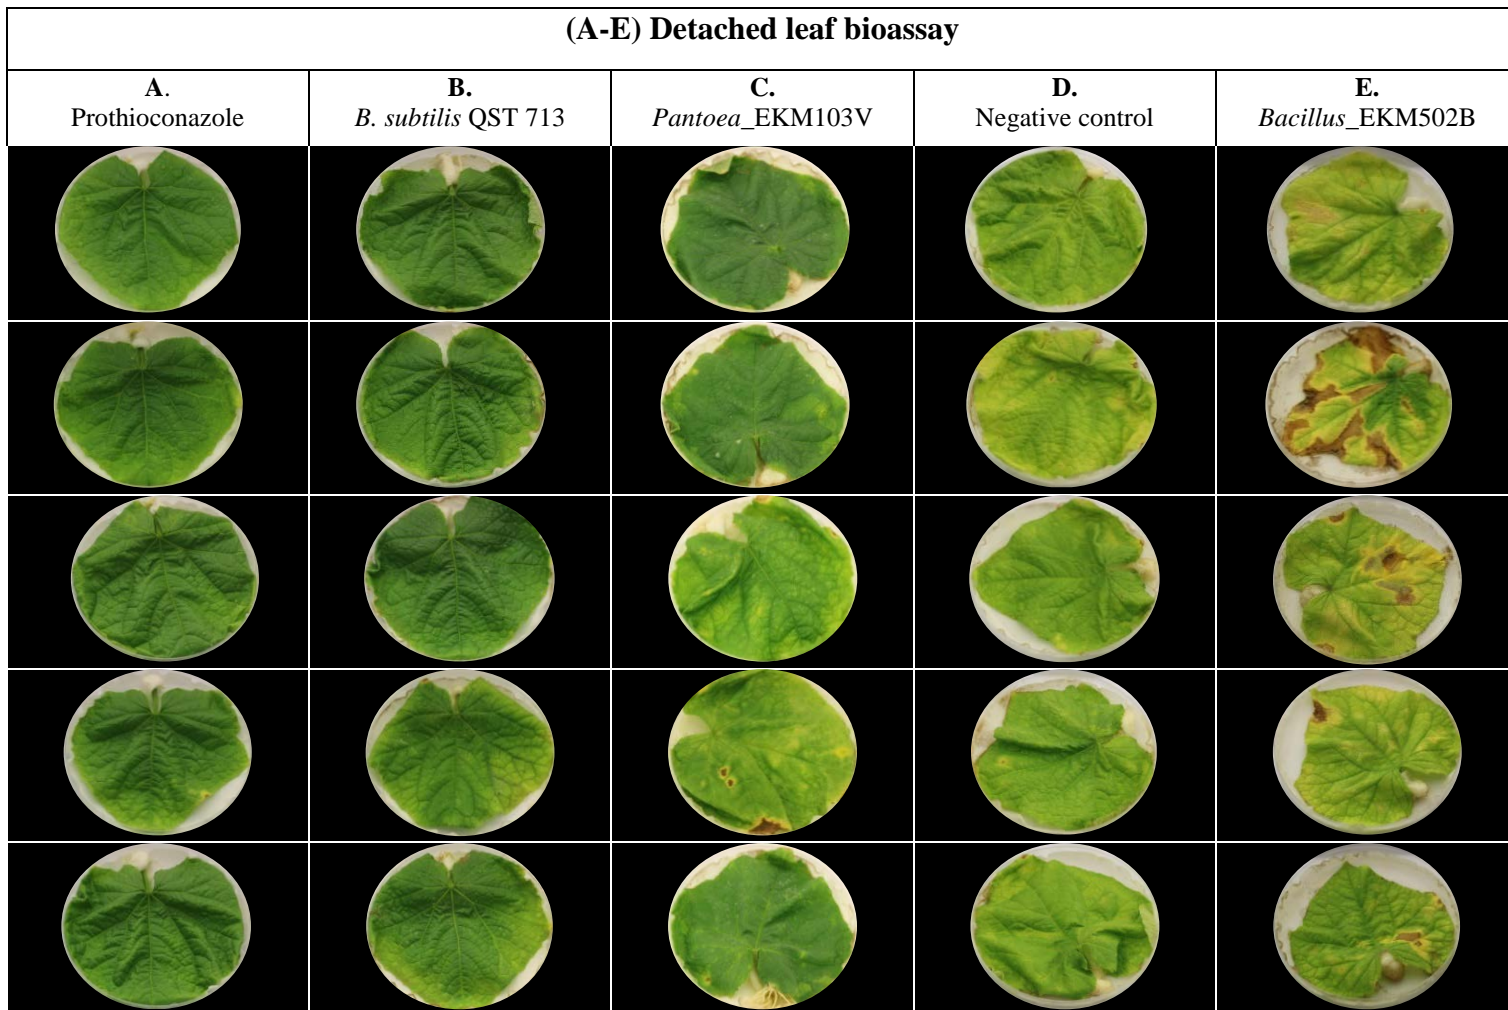

**Figure S1. Selected powdery mildew disease leaf photos corresponding to different levels of disease severity used as references to guide visual disease assessments of the detached whole leaf bioassay. (A-E) Shown are representative photos of tested cucumber leaves: (A) chemical fungicide positive control (Prothioconazole), (B) commercial biocontrol agent positive control (*Bacillus subtilis* strain QST 713), (C) example of a typical promising endophytic bacteria; *Pantoea* EKM103V , (D) negative control (LB broth amended with filter sterilized 0.01% Tween 20), (E) example of an inoculant *Bacillus*\_EKM502B with adverse effect. R (1-5) denotes replicate number.**
