# Supplementary material for: Bacterial Seed Endophytes of Domesticated Cucurbits Antagonize Fungal and Oomycete Pathogens Including Powdery Mildew
Source: Front Microbiol. 2018 Feb 5;9:42. doi: 10.3389/fmicb.2018.00042 (PMC5807410; doi:10.3389/fmicb.2018.00042)
Supplement: TABLE S4 — Raw data and graphical representation of calculated means of the disease index percentage (DI%) displayed by endophytic bacteria that exhibited significant suppression of powdery mildew (p < 0.05) in the leaf disk bioassay along with their corresponding standard deviation and standard error of mean (SEM). Error bars show the SEM. [file Table_4.XLSX]

## Sheet: Sheet1
	Table S4: Raw data and graphical representation of calculated means of the disease index percentage (DI%) displayed by endophytic bacteria that exhibited significant suppression of powdery mildew (p<0.05) in the leaf disc bioassay along with their corresponding standard deviation and standard error of mean (SEM). Error bars show the SEM.
	Treatment	Rep1	Rep2	Rep3	Average	St-Dev	St-error	P value
	Negative control	82.8571	80	82.8571	81.9048	1.64957	0.952381
	Prothioconazole	31.4286	31.4286	31.4286	31.4286	0	0	0.0001
	B.subtilis QST 713	31.4286	42.8571	42.8571	39.0476	6.59829	3.80952	0.0001
	Bacillus_EKM119B	25.7143	25.7143	34.2857	28.5714	4.94872	2.85714	0.0001
	Bacillus_EKM124B	42.8571	51.4286	42.8571	45.7143	4.94872	2.85714	0.0021
	Bacillus_EKM126B	22.8571	28.5714	28.5714	26.6667	3.29914	1.90476	0.0001
	Bacillus_EKM127B	11.4286	51.4286	48.5714	37.1429	22.315	12.8836	0.0001
	Bacillus_EKM201B	40	40	48.5714	42.8571	4.94872	2.85714	0.0006
	Bacillus_EKM210B	28.5714	28.5714	28.5714	28.5714	0	0	0.0001
	Bacillus_EKM211B	28.5714	28.5714	28.5714	28.5714	0	0	0.0001
	Bacillus_EKM215B	42.8571	28.5714	25.7143	32.381	9.18443	5.30263	0.0001
	Bacillus_EKM306B	20	5.71429	22.8571	16.1905	9.18443	5.30263	0.0001
	Bacillus_EKM408B	42.8571	40	45.7143	42.8571	2.85714	1.64957	0.0006
	Bacillus_EKM410B	14.2857	28.5714	40	27.619	12.8836	7.43833	0.0001
	Bacillus_EKM411B	45.7143	51.4286	42.8571	46.6667	4.36436	2.51976	0.0033
	Bacillus_EKM417B	20	20	25.7143	21.9048	3.29914	1.90476	0.0001
	Bacillus_EKM418B	34.2857	40	40	38.0952	3.29914	1.90476	0.0001
	Bacillus_EKM419B	5.71429	8.57143	11.4286	8.57143	2.85714	1.64957	0.0001
	Bacillus_EKM420B	45.7143	51.4286	48.5714	48.5714	2.85714	1.64957	0.0072
	Bacillus_EKM502B	28.5714	28.5714	22.8571	26.6667	3.29914	1.90476	0.0001
	Bacillus_EKM503B	37.1429	22.8571	22.8571	27.619	8.24786	4.7619	0.0001
	Bacillus_EKM504B	42.8571	42.8571	42.8571	42.8571	0	0	0.0006
	Bacillus_EKM505B	28.5714	28.5714	14.2857	23.8095	8.24786	4.7619	0.0001
	Bacillus_EKM702B	25.7143	20	28.5714	24.7619	4.36436	2.51976	0.0001
	Bacillus_EKM703B	28.5714	14.2857	20	20.9524	7.19032	4.15133	0.0001
	Bacillus_EKM706B	34.2857	48.5714	37.1429	40	7.55929	4.36436	0.0002
	Paenibacillus_EKM103P	40	37.1429	42.8571	40	2.85714	1.64957	0.0002
	Paenibacillus_EKM210P	20	54.2857	25.7143	33.3333	18.3689	10.6053	0.0001
	Paenibacillus_EKM303P	25.7143	28.5714	25.7143	26.6667	1.64957	0.952381	0.0001
	Paenibacillus_EKM305P	28.5714	25.7143	28.5714	27.619	1.64957	0.952381	0.0001
	Paenibacillus_EKM306P	14.2857	25.7143	22.8571	20.9524	5.94762	3.43386	0.0001
	Paenibacillus_EKM307P	42.8571	42.8571	51.4286	45.7143	4.94872	2.85714	0.0021
	Paenibacillus_EKM308P	14.2857	17.1429	14.2857	15.2381	1.64957	0.952381	0.0001
	Paenibacillus_EKM309P	40	37.1429	42.8571	40	2.85714	1.64957	0.0002
	Paenibacillus_EKM310P	37.1429	34.2857	17.1429	29.5238	10.817	6.24518	0.0001
	Paenibacillus_EKM312P	14.2857	8.57143	8.57143	10.4762	3.29914	1.90476	0.0001
	UnclassifiedPaenibacillaceae_EKM501M	14.2857	28.5714	14.2857	19.0476	8.24786	4.7619	0.0001
	Lactococcus_EKM102L	25.7143	28.5714	20	24.7619	4.36436	2.51976	0.0001
	Lactococcus_EKM203L	37.1429	17.1429	8.57143	20.9524	14.6617	8.46495	0.0001
	Lactococcus_EKM501L	14.2857	14.2857	2.85714	10.4762	6.59829	3.80952	0.0001
	Lactococcus_EKM502L	25.7143	22.8571	5.71429	18.0952	10.817	6.24518	0.0001
	Pediococcus_EKM201D	14.2857	14.2857	14.2857	14.2857	0	0	0.0001
	Pediococcus_EKM202D	8.57143	8.57143	8.57143	8.57143	0	0	0.0001
	Staphylococcus_EKM201S	20	17.1429	20	19.0476	1.64957	0.952381	0.0001
	UnclassifiedEnterobacteriaceae_EKM102E	17.1429	8.57143	14.2857	13.3333	4.36436	2.51976	0.0001
	UnclassifiedEnterobacteriaceae_EKM102Z	22.8571	28.5714	22.8571	24.7619	3.29914	1.90476	0.0001
	UnclassifiedEnterobacteriaceae_EKM301K	14.2857	11.4286	8.57143	11.4286	2.85714	1.64957	0.0001
	UnclassifiedEnterobacteriaceae_EKM302K	20	22.8571	17.1429	20	2.85714	1.64957	0.0001
	UnclassifiedEnterobacteriaceae_EKM301Z	8.57143	17.1429	11.4286	12.381	4.36436	2.51976	0.0001
	UnclassifiedEnterobacteriaceae_EKM403G	42.8571	37.1429	37.1429	39.0476	3.29914	1.90476	0.0001
	UnclassifiedEnterobacteriaceae_EKM601Z	80	28.5714	17.1429	41.9048	33.4827	19.3312	0.0004
	UnclassifiedEnterobacteriaceae_EKM602Z	17.1429	20	14.2857	17.1429	2.85714	1.64957	0.0001
	UnclassifiedEnterobacteriaceae_EKM603Z	20	45.7143	45.7143	37.1429	14.8461	8.57143	0.0001
	Pantoea_EKM101V	14.2857	11.4286	2.85714	9.52381	5.94762	3.43386	0.0001
	Pantoea_EKM103V	22.8571	22.8571	20	21.9048	1.64957	0.952381	0.0001
	Cronobacter_EKM102R	62.8571	31.4286	37.1429	43.8095	16.7413	9.66561	0.0009
	Pseudomonas_EKM103A	28.5714	28.5714	28.5714	28.5714	0	0	0.0001
	Pseudomonas_EKM402A	22.8571	28.5714	42.8571	31.4286	10.3016	5.94762	0.0001
	Pseudomonas_EKM403A	14.2857	11.4286	5.71429	10.4762	4.36436	2.51976	0.0001
	Microbacterium_EKM101T	25.7143	28.5714	25.7143	26.6667	1.64957	0.952381	0.0001
	Microbacterium_EKM102T	28.5714	20	17.1429	21.9048	5.94762	3.43386	0.0001
	UnclassifiedMicrobacteriaceae_EKM601Y	31.4286	34.2857	31.4286	32.381	1.64957	0.952381	0.0001
	Rathayibacter_EKM201Y	48.5714	40	42.8571	43.8095	4.36436	2.51976	0.0009
	Micrococcus_EKM201U	37.1429	28.5714	34.2857	33.3333	4.36436	2.51976	0.0001
	Micrococcus_EKM501U	28.5714	28.5714	22.8571	26.6667	3.29914	1.90476	0.0001
